# Supplementary material for: Automated generation of radical species in crystalline carbohydrate using ab initio MD simulations
Source: Royal Society of Chemistry journal article supplement (doi:10.1039/c4cp02179g), 2014-01-01
Supplement: c4cp02179g2.pdf [file c4cp02179g2.pdf]

## Supplementary info

### Automated generation of radical species in crystalline carbohydrate using *ab initio* MD simulations

Siv G. Aalbergsjø<sup>1\*</sup>, Ewald Pauwels<sup>2</sup>, Andy Van Yperen-De Deyne<sup>3</sup>,  
Veronique Van Speybroeck<sup>3</sup> and Einar Sagstuen<sup>1</sup>

<sup>1</sup>Department of Physics, University of Oslo, P. O. Box 1048 Blindern, N-0316, Oslo, Norway.

<sup>2</sup>UGent HPC, Ghent University, Krijgslaan 281 S9, B-9000 Gent, Belgium

<sup>3</sup>Center for Molecular Modeling, Ghent University, Technologiepark 903, B-9052 Zwijnaarde, Belgium

\*E-mail: s.g.aalbergsjo@fys.uio.no

#### A. Radical product formation

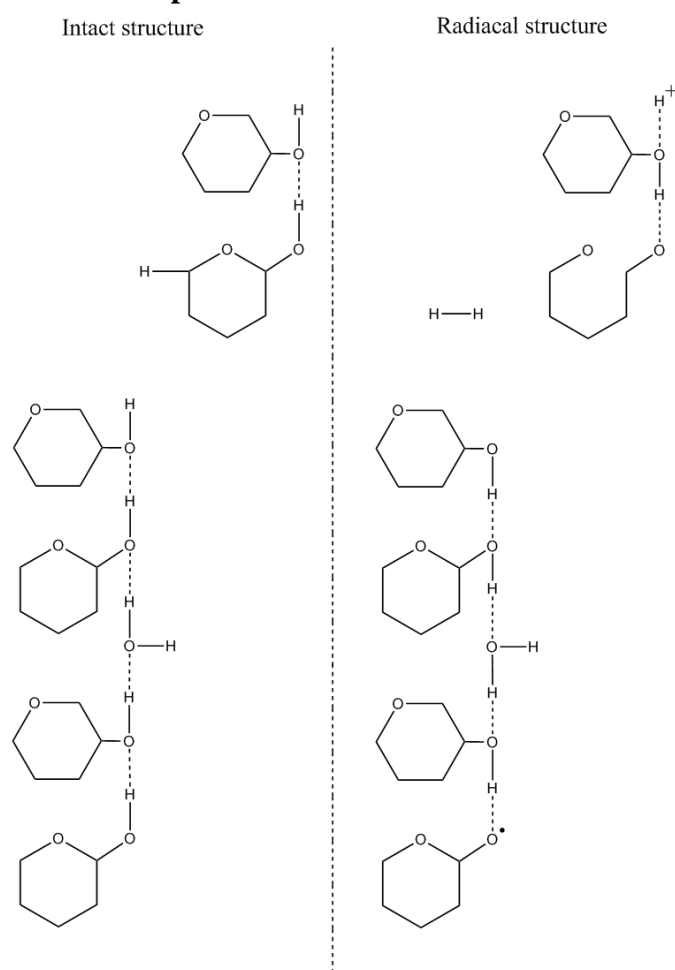

**Figure 1:** Oxidative alkoxy deprotonation product formation including hydrogen molecule formation. An alkoxy radical is stabilized on O1 by deprotonation along O1-O2-Ow-... hydrogen bond chain. Proton from deprotonation reaction chain has attracted a hydrogen anion from the C5 position of another rhamnose which has maintained neutrality by deprotonation from O1.

## B. Hyperfine couplings of radical structures produced by MD simulations

**Table 1:** Calculated hfcs for the dehydroxylation products. Isotropic ( $A_{\text{iso}}$ ) and anisotropic ( $A_{\text{ani}}$ ) hyperfine couplings are in MHz. Principal directions are given with respect to the orthogonal crystallographic axes  $a^*bc$ .

| Structure | Atom | $A_{\text{iso}}$ | $A_{\text{ani}}$ | Direction cosines |        |        |
|-----------|------|------------------|------------------|-------------------|--------|--------|
|           |      |                  |                  | $a^*$             | $b$    | $c$    |
| (a)       | H1   | -52.3            | -33.5            | 0.657             | -0.353 | -0.667 |
|           |      |                  | -3.2             | 0.592             | 0.789  | 0.167  |
|           |      |                  | 36.7             | -0.467            | 0.504  | -0.727 |
|           | H2   | 6.6              | -6.6             | 0.587             | -0.578 | 0.567  |
|           |      |                  | -3.4             | 0.638             | 0.761  | 0.115  |
|           |      |                  | 10.0             | -0.499            | 0.294  | 0.816  |
|           | H5   | 10.0             | -3.9             | -0.324            | -0.391 | 0.862  |
|           |      |                  | -2.8             | 0.026             | 0.907  | 0.421  |
|           |      |                  | 6.7              | 0.946             | -0.158 | 0.284  |
| HO2       | 15.8 | -5.2             | -0.786           | 0.417             | -0.456 |        |
|           |      | -2.3             | 0.322            | 0.907             | 0.273  |        |
|           |      | 7.5              | -0.528           | -0.068            | 0.847  |        |
| (b)       | H1   | 24.0             | -5.8             | -0.735            | 0.613  | 0.291  |
|           |      |                  | -3.6             | -0.655            | -0.752 | -0.071 |
|           |      |                  | 9.4              | -0.176            | 0.242  | -0.954 |
|           | H2   | -49.0            | -34.2            | 0.208             | -0.375 | 0.903  |
|           |      |                  | -3.7             | -0.654            | -0.740 | -0.156 |
|           |      |                  | 37.9             | 0.727             | -0.559 | -0.400 |
|           | H3   | 122.8            | -5.3             | -0.401            | 0.555  | 0.730  |
|           |      |                  | -2.4             | 0.475             | 0.806  | -0.353 |
|           |      |                  | 7.7              | -0.784            | 0.205  | -0.590 |
| HO1       | 7.5  | -5.0             | 0.164            | -0.802            | -0.574 |        |
|           |      | -1.9             | 0.981            | 0.193             | 0.011  |        |
|           |      | 6.9              | 0.102            | -0.565            | 0.819  |        |
| (c)       | H1   | 12.7             | -1.9             | 0.690             | 0.706  | 0.156  |
|           |      |                  | -1.0             | -0.463            | 0.266  | 0.846  |
|           |      |                  | 2.9              | -0.556            | 0.656  | -0.510 |
|           | H2   | 10.8             | -3.6             | 0.740             | 0.590  | -0.323 |
|           |      |                  | -1.5             | 0.417             | -0.026 | 0.908  |
|           |      |                  | 5.0              | -0.527            | 0.807  | 0.265  |
|           | H3   | 43.4             | -5.1             | 0.749             | 0.305  | -0.589 |
|           |      |                  | -4.0             | 0.662             | -0.300 | 0.687  |
|           |      |                  | 9.1              | -0.033            | 0.904  | 0.426  |
|           | H4   | -40.2            | -32.9            | -0.541            | 0.275  | 0.795  |
|           |      |                  | -3.3             | 0.705             | -0.367 | 0.607  |
|           |      |                  | 36.2             | -0.458            | -0.889 | -0.004 |
|           | H5   | 21.3             | -6.2             | -0.226            | 0.775  | 0.589  |
|           |      |                  | -3.1             | -0.767            | 0.231  | -0.599 |
|           |      |                  | 9.3              | -0.600            | -0.588 | 0.543  |
|           | HO4  | -3.0             | -8.6             | -0.888            | -0.093 | 0.451  |
|           |      |                  | 0.5              | -0.422            | -0.227 | -0.878 |
|           |      |                  | 8.2              | -0.184            | 0.969  | -0.162 |
| Hw        | -3.0 | -9.1             | 0.164            | -0.836            | -0.523 |        |
|           |      | 1.0              | -0.208           | -0.548            | 0.810  |        |
|           |      | 8.1              | -0.964           | -0.024            | -0.264 |        |

**Table 2:** Calculated hfcs for the ring-opened reduction products. Isotropic ( $A_{\text{iso}}$ ) and anisotropic ( $A_{\text{ani}}$ ) hyperfine couplings are in MHz. Principal directions are given with respect to the orthogonal crystallographic axes  $a^*bc$ .

| Structure | Atom | $A_{\text{iso}}$ | $A_{\text{ani}}$ | Direction cosines |        |        |
|-----------|------|------------------|------------------|-------------------|--------|--------|
|           |      |                  |                  | $a^*$             | $b$    | $c$    |
| (d)       | H4   | 8.4              | -5.8             | -0.233            | -0.901 | 0.365  |
|           |      |                  | -3.0             | 0.590             | 0.168  | 0.790  |
|           |      |                  | 8.9              | -0.773            | 0.400  | 0.492  |
|           | H5   | -48.2            | -34.3            | -0.439            | -0.405 | 0.802  |
|           |      |                  | -3.3             | 0.713             | 0.387  | 0.585  |
|           |      |                  | 37.6             | -0.547            | 0.829  | 0.119  |
|           | H6   | 103.7            | -4.8             | 0.981             | -0.188 | -0.041 |
|           |      |                  | -3.2             | 0.190             | 0.906  | 0.379  |
|           |      |                  | 8.1              | 0.034             | 0.379  | -0.925 |
|           | H6   | 91.8             | -4.9             | -0.028            | 0.668  | 0.744  |
|           |      |                  | -3.6             | 0.831             | -0.398 | 0.388  |
|           |      |                  | 8.4              | 0.555             | 0.629  | -0.544 |
|           | H6   | 2.0              | -4.3             | 0.796             | -0.073 | -0.600 |
|           |      |                  | -3.6             | 0.571             | 0.419  | 0.706  |
|           |      |                  | 7.8              | -0.200            | 0.905  | -0.376 |
| HO4       | -5.3 | -9.1             | -0.995           | -0.042            | -0.089 |        |
|           |      | -1.5             | -0.067           | -0.365            | 0.929  |        |
|           |      | 10.6             | -0.071           | 0.930             | 0.360  |        |
| HOring    | 9.4  | -3.5             | -0.730           | 0.574             | 0.372  |        |
|           |      | -1.5             | -0.427           | -0.807            | 0.408  |        |
|           |      | 5.0              | -0.534           | -0.139            | -0.834 |        |
| (e)       | H1   | -19.9            | -33.1            | -0.506            | -0.719 | 0.477  |
|           |      |                  | -4.1             | -0.850            | 0.511  | -0.132 |
|           |      |                  | 37.2             | 0.149             | 0.472  | 0.869  |
|           | H2   | 72.7             | -5.7             | -0.583            | -0.801 | -0.137 |
|           |      |                  | -4.7             | 0.788             | -0.598 | 0.147  |
|           |      |                  | 10.4             | -0.199            | -0.022 | 0.980  |
|           | HO1  | -5.7             | -10.6            | -0.260            | -0.704 | 0.661  |
|           |      |                  | -6.8             | -0.867            | 0.472  | 0.162  |
|           |      |                  | 17.5             | -0.426            | -0.531 | -0.733 |
|           | H6   | -0.7             | -7.0             | 0.0293            | 0.420  | 0.907  |
|           |      |                  | -6.03            | -0.217            | -0.883 | 0.416  |
|           |      |                  | 13.0             | 0.976             | -0.209 | 0.065  |

**Table 3:** Calculated hfcs for the dehydrogenated reduction products. Isotropic ( $A_{\text{iso}}$ ) and anisotropic ( $A_{\text{ani}}$ ) hyperfine couplings are in MHz. Principal directions are given with respect to the orthogonal crystallographic axes  $a^*bc$ .

| Structure           | Atom                | $A_{\text{iso}}$ | $A_{\text{ani}}$ | Direction cosines |        |        |
|---------------------|---------------------|------------------|------------------|-------------------|--------|--------|
|                     |                     |                  |                  | $a^*$             | $b$    | $c$    |
| (f)-I               | H2                  | 12.3             | -5.8             | -0.332            | 0.014  | 0.943  |
|                     |                     |                  | -3.3             | 0.642             | 0.736  | 0.215  |
|                     |                     |                  | 9.0              | -0.691            | 0.677  | -0.253 |
|                     | H4                  | 100.2            | -5.2             | -0.003            | -0.374 | 0.927  |
|                     |                     |                  | -1.4             | -0.981            | -0.179 | -0.076 |
|                     |                     |                  | 6.7              | 0.195             | -0.910 | -0.366 |
|                     | HO2                 | -4.2             | -7.4             | -0.126            | 0.992  | 0.018  |
|                     |                     |                  | 0.2              | 0.428             | 0.037  | 0.903  |
|                     |                     |                  | 7.1              | 0.895             | 0.122  | -0.429 |
|                     | HO3                 | 13.9             | -11.0            | -0.522            | 0.608  | 0.598  |
|                     |                     |                  | -8.2             | 0.700             | 0.706  | -0.107 |
|                     |                     |                  | 19.2             | -0.487            | 0.362  | -0.794 |
| H (H <sub>2</sub> ) | 13.5                | -3.5             | 0.308            | -0.951            | 0.011  |        |
|                     |                     | -2.9             | 0.591            | 0.182             | -0.786 |        |
|                     |                     | 6.4              | 0.746            | 0.248             | 0.619  |        |
| (f)-II              | H2                  | 7.2              | -5.7             | -0.378            | 0.019  | 0.926  |
|                     |                     |                  | -3.3             | 0.662             | 0.705  | 0.256  |
|                     |                     |                  | 9.0              | -0.647            | 0.709  | -0.278 |
|                     | H4                  | 101.5            | -4.8             | -0.213            | -0.426 | 0.880  |
|                     |                     |                  | -2.0             | 0.960             | 0.076  | 0.269  |
|                     |                     |                  | 6.8              | -0.181            | 0.902  | 0.393  |
|                     | HO2                 | -4.7             | -8.0             | -0.139            | 0.985  | 0.106  |
|                     |                     |                  | 0.4              | 0.427             | -0.037 | 0.904  |
|                     |                     |                  | 7.6              | 0.894             | 0.171  | -0.415 |
|                     | HO3                 | 3.4              | -11.2            | -0.444            | 0.617  | 0.650  |
|                     |                     |                  | -8.2             | 0.762             | 0.642  | -0.088 |
|                     |                     |                  | 19.4             | -0.471            | 0.456  | -0.755 |
|                     | H (H <sub>2</sub> ) | 3.3              | -3.7             | -0.279            | -0.807 | 0.522  |
|                     |                     |                  | -3.0             | -0.455            | 0.589  | 0.668  |
|                     |                     |                  | 6.7              | -0.846            | -0.052 | -0.531 |
|                     | H (H <sub>2</sub> ) | 5.3              | -3.7             | -0.504            | 0.831  | 0.236  |
|                     |                     |                  | -3.4             | -0.414            | -0.472 | 0.778  |
|                     |                     |                  | 7.1              | -0.758            | -0.295 | -0.582 |
| (g)                 | H4                  | 99.0             | -5.5             | 0.629             | 0.778  | 0.022  |
|                     |                     |                  | -1.3             | 0.563             | -0.474 | 0.677  |
|                     |                     |                  | 6.8              | -0.537            | 0.413  | 0.735  |
|                     | H6                  | 31.9             | -4.7             | -0.004            | 0.892  | 0.451  |
|                     |                     |                  | -4.1             | 0.862             | -0.225 | 0.453  |
|                     |                     |                  | 8.8              | 0.506             | 0.391  | -0.769 |
|                     | H6                  | 14.8             | -4.9             | 0.069             | 0.028  | 0.998  |
|                     |                     |                  | -4.0             | 0.780             | -0.624 | -0.036 |
|                     |                     |                  | 8.9              | 0.622             | 0.781  | -0.065 |
|                     | H6                  | 108.3            | -4.1             | 0.140             | 0.480  | 0.866  |
|                     |                     |                  | -2.6             | 0.987             | -0.137 | -0.083 |
|                     |                     |                  | 6.7              | 0.079             | 0.866  | -0.493 |
| H (H <sub>2</sub> ) | 84.0                | -3.1             | 0.134            | 0.392             | 0.910  |        |

|                     |       |       |        |        |        |
|---------------------|-------|-------|--------|--------|--------|
|                     |       | -2.7  | -0.324 | -0.851 | 0.414  |
|                     |       | 5.8   | 0.937  | -0.350 | 0.013  |
| H (H <sub>2</sub> ) | -11.2 | -13.6 | 0.163  | 0.408  | 0.899  |
|                     |       | -11.2 | -0.308 | -0.844 | 0.439  |
|                     |       | 24.8  | 0.937  | -0.348 | -0.012 |

**Table 4:** Calculated hfcs for the dehydrogenated reduction products with H<sub>2</sub> molecules removed from the crystal structure. Isotropic ( $A_{\text{iso}}$ ) and anisotropic ( $A_{\text{ani}}$ ) hyperfine couplings are in MHz. Principal directions are given with respect to the orthogonal crystallographic axes  $a^*bc$ .

| Structure | Atom | $A_{\text{iso}}$ | $A_{\text{ani}}$ | Direction cosines |        |        |
|-----------|------|------------------|------------------|-------------------|--------|--------|
|           |      |                  |                  | $a^*$             | $b$    | $c$    |
| (f)-I     | H2   | 9.9              | -5.7             | -0.311            | 0.024  | 0.950  |
|           |      |                  | -3.3             | 0.642             | 0.742  | 0.192  |
|           |      |                  | 9.0              | -0.700            | 0.670  | -0.246 |
|           | H4   | 97.8             | -5.1             | -0.036            | -0.375 | 0.926  |
|           |      |                  | -1.6             | -0.980            | -0.169 | -0.107 |
|           |      |                  | 6.7              | 0.196             | -0.912 | -0.361 |
|           | HO2  | -4.1             | -7.4             | -0.134            | 0.991  | 0.009  |
|           |      |                  | 0.2              | 0.431             | 0.050  | 0.901  |
|           |      |                  | 7.1              | 0.892             | 0.125  | -0.434 |
|           | HO3  | 3.7              | -12.1            | -0.482            | 0.591  | 0.646  |
|           |      |                  | -8.9             | 0.713             | 0.694  | -0.103 |
|           |      |                  | 21.0             | -0.509            | 0.411  | -0.756 |
| (f)-II    | H2   | 6.1              | -5.7             | -0.359            | 0.036  | 0.933  |
|           |      |                  | -3.3             | 0.666             | 0.710  | 0.229  |
|           |      |                  | 9.0              | -0.654            | 0.703  | -0.279 |
|           | H4   | 97.4             | -4.8             | -0.235            | -0.419 | 0.877  |
|           |      |                  | -2.0             | 0.959             | 0.048  | 0.280  |
|           |      |                  | 6.7              | -0.159            | 0.907  | 0.391  |
|           | HO2  | -4.6             | -7.9             | -0.151            | 0.984  | 0.092  |
|           |      |                  | 0.4              | 0.416             | -0.021 | 0.909  |
|           |      |                  | 7.5              | 0.897             | 0.175  | -0.406 |
|           | HO3  | -0.8             | -11.9            | -0.379            | 0.624  | 0.683  |
|           |      |                  | -8.8             | 0.796             | 0.596  | -0.103 |
|           |      |                  | 20.7             | -0.472            | 0.505  | -0.723 |
| (g)       | H4   | 95.4             | -5.4             | 0.644             | 0.764  | 0.031  |
|           |      |                  | -1.4             | 0.516             | -0.464 | 0.720  |
|           |      |                  | 6.8              | -0.564            | 0.448  | 0.693  |
|           | H6   | 37.0             | -4.7             | -0.706            | 0.686  | -0.174 |
|           |      |                  | -4.5             | 0.467             | 0.637  | 0.613  |
|           |      |                  | 9.2              | -0.532            | -0.352 | 0.770  |
|           | H6   | 14.6             | -4.8             | -0.130            | 0.153  | 0.980  |
|           |      |                  | -4.4             | 0.752             | -0.629 | 0.198  |
|           |      |                  | 9.2              | 0.646             | 0.762  | -0.033 |
|           | H6   | 122.9            | -4.0             | 0.076             | 0.485  | 0.871  |
|           |      |                  | -2.6             | 0.991             | -0.135 | -0.011 |
|           |      |                  | 6.6              | 0.113             | 0.864  | -0.490 |

**Table 5:** Calculated hfcs for alkoxy radicals not observed in experiments. Isotropic ( $A_{\text{iso}}$ ) and anisotropic ( $A_{\text{ani}}$ ) hyperfine couplings are in MHz. Principal directions are given with respect to the orthogonal crystallographic axes  $a^*bc$ .

| Structure | Atom                | $A_{\text{iso}}$ | $A_{\text{ani}}$ | Direction cosines |        |        |
|-----------|---------------------|------------------|------------------|-------------------|--------|--------|
|           |                     |                  |                  | $a^*$             | $b$    | $c$    |
| (h)       | H1                  | 128.9            | -5.3             | 0.371             | 0.724  | -0.581 |
|           |                     |                  | -3.8             | -0.289            | 0.685  | 0.669  |
|           |                     |                  | 9.2              | -0.882            | 0.080  | -0.464 |
|           | H2                  | -7.6             | -9.3             | -0.844            | 0.161  | -0.511 |
|           |                     |                  | -2.0             | -0.275            | 0.689  | 0.671  |
|           |                     |                  | 11.3             | -0.460            | -0.707 | 0.537  |
|           | HO2                 | 20.4             | -5.7             | 0.595             | 0.122  | 0.794  |
|           |                     |                  | -4.5             | -0.111            | 0.991  | -0.069 |
|           |                     |                  | 10.2             | 0.796             | 0.047  | -0.603 |
|           | HO3                 | 11.8             | -2.8             | 0.776             | 0.534  | -0.336 |
|           |                     |                  | -1.5             | -0.406            | 0.830  | 0.381  |
|           |                     |                  | 4.3              | -0.483            | 0.159  | -0.861 |
| (i)       | H3<br>neighbor      | 10.3             | -1.2             | -0.602            | 0.683  | 0.414  |
|           |                     |                  | -0.5             | 0.472             | -0.114 | 0.874  |
|           |                     |                  | 1.7              | -0.644            | -0.721 | 0.254  |
|           | HO3<br>neighbor     | -4.7             | -7.4             | 0.843             | -0.035 | -0.537 |
|           |                     |                  | -0.9             | 0.140             | -0.949 | 0.282  |
|           |                     |                  | 8.3              | 0.520             | 0.313  | 0.795  |
|           | H2                  | 264.6            | -10.5            | -0.797            | -0.233 | -0.557 |
|           |                     |                  | -8.7             | -0.592            | 0.483  | 0.645  |
|           |                     |                  | 19.1             | -0.119            | -0.844 | 0.523  |
|           | H3                  | -5.8             | -6.3             | -0.400            | 0.059  | 0.914  |
|           |                     |                  | -1.7             | 0.470             | 0.870  | 0.149  |
|           |                     |                  | 8.1              | -0.786            | 0.490  | -0.376 |
|           | H4                  | 6.7              | -4.6             | -0.092            | 0.204  | 0.975  |
|           |                     |                  | 1.3              | 0.113             | -0.970 | 0.214  |
|           |                     |                  | 3.3              | 0.989             | 0.130  | 0.066  |
|           | HO2<br>deprot       | -1.2             | -6.3             | 0.388             | -0.731 | 0.561  |
|           |                     |                  | -5.6             | 0.736             | 0.612  | 0.289  |
|           |                     |                  | 11.9             | -0.555            | 0.301  | 0.776  |
|           | HO3                 | -3.0             | -5.6             | -0.739            | 0.532  | 0.413  |
|           |                     |                  | -2.5             | -0.529            | -0.838 | 0.133  |
|           |                     |                  | 8.1              | -0.417            | 0.120  | -0.901 |
|           | H<br>H-bonded to O2 | -1.8             | -6.9             | -0.639            | 0.574  | 0.512  |
|           |                     |                  | -5.9             | 0.714             | 0.691  | 0.115  |
|           |                     |                  | 12.8             | -0.288            | 0.439  | -0.851 |
| (j)       | H2                  | 41.1             | -4.4             | -0.888            | 0.417  | 0.193  |
|           |                     |                  | 0.6              | 0.163             | -0.106 | 0.981  |
|           |                     |                  | 3.8              | 0.430             | 0.903  | 0.026  |
|           | H3                  | 36.9             | -4.8             | -0.122            | -0.241 | 0.963  |
|           |                     |                  | -3.7             | -0.575            | -0.773 | -0.267 |
|           |                     |                  | 8.5              | 0.809             | -0.586 | -0.044 |
|           | H4                  | 4.1              | -8.6             | 0.375             | 0.671  | 0.640  |
|           |                     |                  | -0.2             | 0.678             | 0.273  | -0.683 |
|           |                     |                  | 8.8              | -0.633            | 0.690  | -0.352 |
|           | H6                  | 8.9              | -1.3             | -0.794            | 0.455  | -0.403 |

|          |      |      |        |        |        |
|----------|------|------|--------|--------|--------|
|          |      | -0.5 | 0.492  | 0.871  | 0.013  |
|          |      | 1.8  | -0.357 | 0.188  | 0.915  |
| HO3      | -0.8 | -7.8 | -0.785 | 0.530  | 0.320  |
| deprot   |      | -5.7 | -0.485 | -0.848 | 0.214  |
|          |      | 13.6 | -0.385 | -0.012 | -0.923 |
| H2       | 12.7 | -7.3 | 0.780  | 0.084  | 0.621  |
| neighbor |      | -6.3 | -0.528 | -0.444 | 0.724  |
|          |      | 13.6 | -0.336 | 0.892  | 0.301  |



**Table 6:** Calculated hfcs for alkoxy radical matching experimentally observed data. Isotropic ( $A_{\text{iso}}$ ) and anisotropic ( $A_{\text{ani}}$ ) hyperfine couplings are in MHz. Principal directions are given with respect to the orthogonal crystallographic axes  $a^*bc$ .

| Structure                | Atom          | $A_{\text{iso}}$ | $A_{\text{ani}}$ | Direction cosines |        |        |
|--------------------------|---------------|------------------|------------------|-------------------|--------|--------|
|                          |               |                  |                  | $a^*$             | $b$    | $c$    |
| <b>(k)</b><br><b>I</b>   | H2            | 81.4             | -4.2             | 0.816             | 0.441  | -0.374 |
|                          |               |                  | -1.8             | 0.512             | -0.251 | 0.821  |
|                          |               |                  | 6.1              | -0.268            | 0.862  | 0.431  |
|                          | H3            | 5.4              | -8.9             | -0.150            | -0.230 | 0.962  |
|                          |               |                  | -1.0             | -0.827            | 0.562  | 0.005  |
|                          |               |                  | 9.9              | -0.542            | -0.794 | -0.275 |
|                          | H4            | 37.6             | -6.0             | 0.252             | -0.707 | 0.660  |
|                          |               |                  | -3.2             | 0.429             | -0.530 | -0.731 |
|                          |               |                  | 9.2              | 0.867             | 0.468  | 0.170  |
|                          | HO3           | -6.0             | -8.7             | 0.586             | 0.744  | -0.322 |
|                          |               |                  | -1.4             | 0.690             | -0.666 | -0.283 |
|                          |               |                  | 10.1             | -0.425            | -0.057 | -0.904 |
|                          | HO4           | -1.8             | -7.0             | 0.518             | -0.004 | 0.856  |
|                          |               |                  | -6.3             | 0.836             | -0.211 | -0.507 |
|                          |               |                  | 13.3             | 0.182             | 0.978  | -0.106 |
| Hw                       | -0.7          | -6.1             | 0.242            | -0.598            | 0.764  |        |
|                          |               | -4.9             | 0.321            | -0.694            | -0.645 |        |
|                          |               | 11.0             | 0.916            | 0.401             | 0.024  |        |
| <b>(k)</b><br><b>II</b>  | H2            | 81.0             | -4.2             | -0.852            | 0.381  | 0.358  |
|                          |               |                  | -1.7             | 0.468             | 0.250  | 0.848  |
|                          |               |                  | 5.9              | -0.234            | -0.890 | 0.391  |
|                          | H3            | 7.1              | -8.3             | -0.157            | 0.178  | 0.972  |
|                          |               |                  | -1.1             | 0.788             | 0.615  | 0.015  |
|                          |               |                  | 9.4              | -0.595            | 0.768  | -0.236 |
|                          | H4            | 22.3             | -6.2             | 0.269             | 0.666  | 0.696  |
|                          |               |                  | -2.9             | -0.434            | -0.561 | 0.705  |
|                          |               |                  | 9.1              | 0.860             | -0.491 | 0.138  |
|                          | HO3           | -6.7             | -9.4             | -0.631            | 0.684  | 0.367  |
|                          |               |                  | -1.9             | -0.638            | -0.726 | 0.257  |
|                          |               |                  | 11.2             | -0.442            | 0.071  | -0.894 |
|                          | HO4           | -2.3             | -7.5             | 0.638             | 0.006  | 0.770  |
|                          |               |                  | -6.9             | 0.765             | 0.115  | -0.634 |
|                          |               |                  | 14.4             | -0.093            | 0.993  | 0.069  |
| <b>(k)</b><br><b>III</b> | H2            | 82.2             | -4.3             | 0.822             | 0.404  | -0.402 |
|                          |               |                  | -1.7             | 0.523             | -0.255 | 0.813  |
|                          |               |                  | 5.9              | -0.226            | 0.878  | 0.421  |
|                          | H3            | 4.5              | -9.0             | -0.161            | -0.182 | 0.970  |
|                          |               |                  | -0.9             | -0.813            | 0.581  | -0.026 |
|                          |               |                  | 10.0             | -0.559            | -0.793 | -0.241 |
|                          | H4            | 38.4             | -6.0             | 0.232             | -0.681 | 0.694  |
|                          |               |                  | -3.3             | 0.409             | -0.579 | -0.705 |
|                          |               |                  | 9.3              | 0.882             | 0.448  | 0.145  |
|                          | HO3           | -6.1             | -8.6             | 0.603             | 0.718  | -0.348 |
|                          |               |                  | -1.3             | 0.677             | -0.691 | -0.253 |
|                          |               |                  | 9.9              | -0.422            | -0.083 | -0.903 |
|                          | HO4<br>deprot | -2.9             | -7.5             | 0.293             | -0.037 | 0.955  |
|                          |               |                  | -7.1             | 0.949             | -0.108 | -0.295 |

|            |      |      |       |        |        |        |
|------------|------|------|-------|--------|--------|--------|
|            |      |      | 14.6  | 0.114  | 0.993  | 0.003  |
| <b>(k)</b> | H2   | 83.0 | -4.2  | -0.818 | 0.423  | 0.389  |
|            |      |      | -1.5  | 0.516  | 0.242  | 0.822  |
| <b>IV</b>  | H3   | 5.0  | 5.7   | -0.253 | -0.873 | 0.416  |
|            |      |      | -9.1  | -0.154 | 0.177  | 0.972  |
|            |      |      | -0.9  | 0.815  | 0.579  | 0.023  |
| H4         | 36.8 | 10.0 | -10.0 | -0.558 | 0.796  | -0.234 |
|            |      |      | -6.1  | 0.249  | 0.656  | 0.713  |
|            |      |      | -3.1  | -0.421 | -0.590 | 0.690  |
| HO3        | -6.4 | 9.2  | 9.2   | 0.872  | -0.472 | 0.129  |
|            |      |      | -9.0  | 0.608  | -0.712 | -0.351 |
|            |      |      | -1.5  | -0.671 | -0.698 | 0.251  |
| HO4        | -2.5 | 10.5 | 10.5  | -0.424 | 0.083  | -0.902 |
|            |      |      | -7.4  | 0.506  | -0.026 | 0.862  |
|            |      |      | -6.7  | -0.844 | -0.218 | 0.490  |
| deprot     | -0.7 | 14.0 | 14.0  | 0.175  | -0.976 | -0.132 |
|            |      |      | -6.2  | 0.215  | 0.538  | 0.815  |
|            |      |      | -4.9  | -0.324 | -0.748 | 0.579  |
| Hw         | -0.7 | 11.1 | 11.1  | 0.921  | -0.389 | 0.013  |
|            |      |      |       |        |        |        |

**Table 7:** Calculated hfcs for ring-opened oxidation product. Isotropic ( $A_{\text{iso}}$ ) and anisotropic ( $A_{\text{ani}}$ ) hyperfine couplings are in MHz. Principal directions are given with respect to the orthogonal crystallographic axes  $a^*bc$ .

| Structure                                  | Atom | $A_{\text{iso}}$ | $A_{\text{ani}}$ | Direction cosines |        |        |
|--------------------------------------------|------|------------------|------------------|-------------------|--------|--------|
|                                            |      |                  |                  | $a^*$             | $b$    | $c$    |
| <b>(l)</b>                                 | H4   | -4.7             | -8.5             | -0.653            | -0.754 | 0.074  |
|                                            |      |                  | -2.0             | 0.174             | -0.054 | 0.983  |
|                                            |      |                  | 10.5             | 0.737             | -0.655 | -0.166 |
| H5                                         | 94.7 | 94.7             | -5.3             | 0.703             | 0.706  | -0.084 |
|                                            |      |                  | -4.4             | -0.278            | 0.381  | 0.882  |
|                                            |      |                  | 9.7              | -0.654            | 0.597  | -0.464 |
| H6                                         | 10.2 | 10.2             | -3.3             | -0.655            | 0.727  | -0.209 |
|                                            |      |                  | -0.8             | 0.258             | 0.474  | 0.842  |
|                                            |      |                  | 4.1              | -0.711            | -0.497 | 0.498  |
| H6                                         | 8.1  | 8.1              | -3.1             | 0.940             | -0.276 | -0.200 |
|                                            |      |                  | -2.0             | 0.266             | 0.225  | 0.938  |
|                                            |      |                  | 5.2              | 0.214             | 0.935  | -0.284 |
| HO4                                        | -4.3 | -4.3             | -8.6             | 0.534             | 0.839  | -0.105 |
|                                            |      |                  | -3.7             | -0.235            | 0.266  | 0.935  |
|                                            |      |                  | 12.2             | -0.812            | 0.474  | -0.339 |
| HO3<br>neighbor<br>H-bonded to ring oxygen | -4.0 | -4.0             | -9.1             | -0.739            | 0.617  | 0.270  |
|                                            |      |                  | -7.8             | -0.543            | -0.783 | 0.304  |
|                                            |      |                  | 16.9             | -0.399            | -0.078 | -0.914 |

### C. On the Schonland ambiguity for the C3-centered radical

The hfc of radical (f) show a good match with the radical described as Radical 3 and 4 in the experimental work of Sagstuen *et al.*<sup>1</sup> except for the sign of the *c*-components of the principal directions of the hfc tensor. A change in sign of the *c*-component is not an allowed site transformation in this crystal as there are only two asymmetric units per unit cell and the *b*-axis is the only twofold symmetry axis (space group P2<sub>1</sub>). It is well known that the experimental analysis of hyperfine coupling- and g-tensors result in two possible solutions, the physical solution and an unphysical solution. This is called the Schonland ambiguity<sup>2, 3</sup>. Specific experiments must be performed in order to resolve this ambiguity. This was not done in the experimental work by Sagstuen *et al.*<sup>1</sup>, one of the two solutions was chosen almost arbitrarily, as they were very similar.

The calculation of the second solution (the Schonland conjugate) variant has been made using the procedures of Vrielinck *et al.* under the assumption that it was the high-frequency ENDOR line which was used to determine the tensor by the experimentalists and using B-field values from two extreme points of the EPR spectrum from the radical (339-343 mT). In addition the Schonland conjugate was calculated by only changing signs in the off-diagonal elements of the squared hfc matrix. These two different versions of the Schonland conjugate were nearly indistinguishable, as expected for a  $\beta$ -coupling<sup>3</sup>.

The two versions of the experimental tensor are given in Table 8 and it can be seen that distinguishing between these tensors is difficult considering only the overall shape of the coupling. Table 9 displays the C3  $\cdots$  H4 directions in the intact crystal structure as determined by neutron diffraction<sup>4</sup> as well as the corresponding directions in the two versions of this radical seen in the DFT analyses. It is clear that the originally published experimental tensor has as its largest principal value direction along the line connecting the two atoms in the crystal structure. It is therefore natural to assume that this was the main reason for choosing between the two Schonland conjugates in the experimental work. The present analysis on the other hand, shows that the direction between the same atoms in the optimized radical structure is similar to the original except for that the sign of the *c*-component is changed. The direction of interaction between these two atoms in the radical therefore actually fits better with the other Schonland conjugate. Comparing the DFT calculated hfc tensors with the Schonland conjugate of the experimentally published tensor demonstrates an excellent agreement. This is the reason for why the Schonland conjugate of the published experimental tensor is assumed to be the correct physical solution and consequently used for comparison with the DFT data obtained in the present study.

**Table 8: Experimental hfc (MHz) tensor<sup>1</sup> for C3-centered net hydrogen abstracted radical before and after Schonland conjugation.**

|                     | $A_{\text{iso}}$ | $A_{\text{ani}}$ | Direction cosines |        |        |
|---------------------|------------------|------------------|-------------------|--------|--------|
|                     |                  |                  | $a^*$             | $b$    | $c$    |
| Original            | 96.07            | 6.63             | -0.177            | 0.923  | -0.342 |
|                     |                  | -1.4             | 0.945             | 0.062  | -0.322 |
|                     |                  | -5.24            | 0.276             | 0.380  | 0.883  |
| Schonland conjugate | 96.10            | 6.73             | 0.207             | -0.913 | -0.351 |
|                     |                  | -1.77            | 0.976             | 0.166  | 0.144  |
|                     |                  | -4.96            | -0.073            | -0.373 | 0.925  |

**Table 9: C3 ... H4 direction in intact crystal structure vs. radical structure (f).**

| Structure                | Direction cosines |       |        |
|--------------------------|-------------------|-------|--------|
|                          | $a^*$             | $b$   | $c$    |
| Intact crystal structure | -0.010            | 0.928 | -0.372 |
| Radical f-I              | -0.114            | 0.928 | 0.355  |
| Radical f-II             | -0.063            | 0.917 | 0.394  |

#### **D. References**

1. E. Sagstuen, M. Lindgren and A. Lund, *Radiat. Res.*, 1991, **128**, 235-242.
2. D. S. Schonland, *Proceedings of the Physical Society*, 1959, **73**, 788-792.
3. H. Vrielinck, H. De Cooman, M. A. Tarpan, E. Sagstuen, M. Waroquier and F. Callens, *Journal Of Magnetic Resonance*, 2008, **195**, 196-205.
4. S. Takagi and G. A. Jeffrey, *Acta Crystallogr. Sect. B-Struct. Commun.*, 1978, **34**, 2551-2555.
